# Supplementary material for: Carbon dot based fluorescent “on–off–on” assays for the determination of Au(iii) ions and biothiols
Source: Royal Society of Chemistry journal article supplement (doi:10.1039/d4ma01052c), 2024-12-11
Supplement: d4ma01052c1.pdf [file d4ma01052c1.pdf]

## Supporting Information

# Carbon dot based fluorescent “on-off-on” assays for the determination of Au(III) ions and biothiols

Zhenzhen Guo<sup>a,c</sup>, Jinwen Zhu<sup>a</sup>, Yue Huang<sup>d</sup>, Jibin Liu<sup>b,\*</sup>, Peng Miao<sup>a,c,\*</sup>

<sup>a</sup> *Suzhou Institute of Biomedical Engineering and Technology, Chinese Academy of Sciences, Suzhou 215163, China*

<sup>b</sup> *Institute of Oncology, Affiliated Tumor Hospital of Nantong University, Nantong 226361, China*

<sup>c</sup> *Shandong Laboratory of Advanced Biomaterials and Medical Devices in Weihai, Weihai 264200, China*

<sup>d</sup> *Department of Food Science and Engineering, College of Light Industry and Food Engineering, Nanjing Forestry University, Nanjing 210037, China*

\* Corresponding authors.

E-mail: tians2008@ntu.edu.cn (J.B. Liu); miaopeng@sibet.ac.cn (P. Miao).

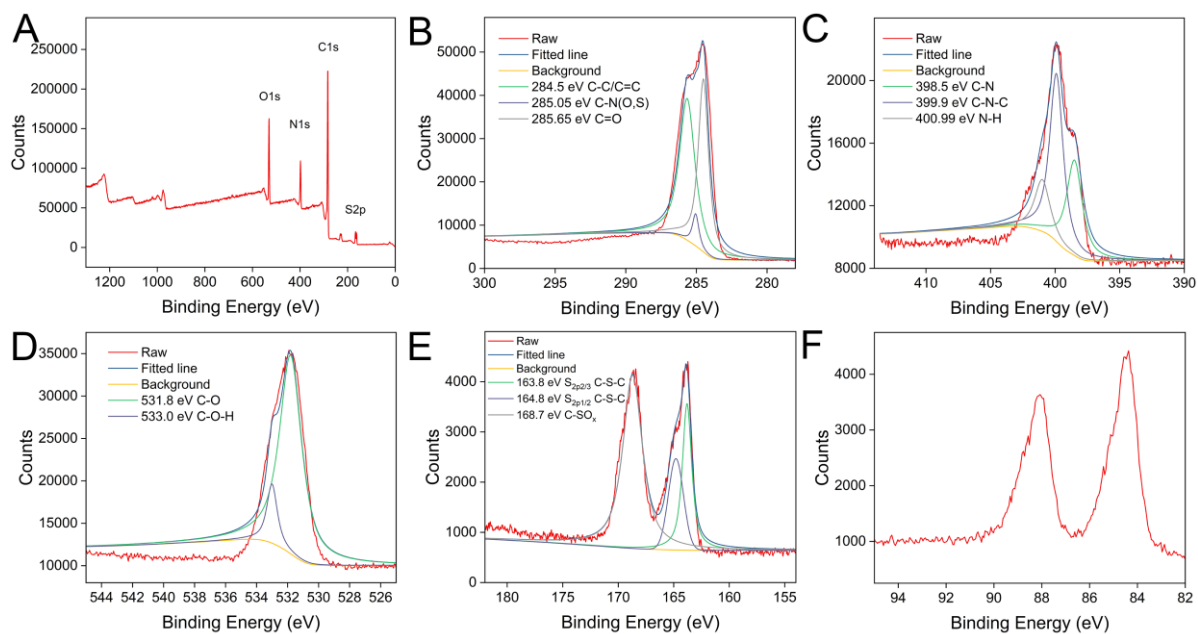

**Figure S1.** (A) XPS scanning spectra of freshly prepared CD. (B-E) XPS high-resolution survey scans. (F) XPS high-resolution survey scan of Au element in CD/Au<sup>3+</sup> system.

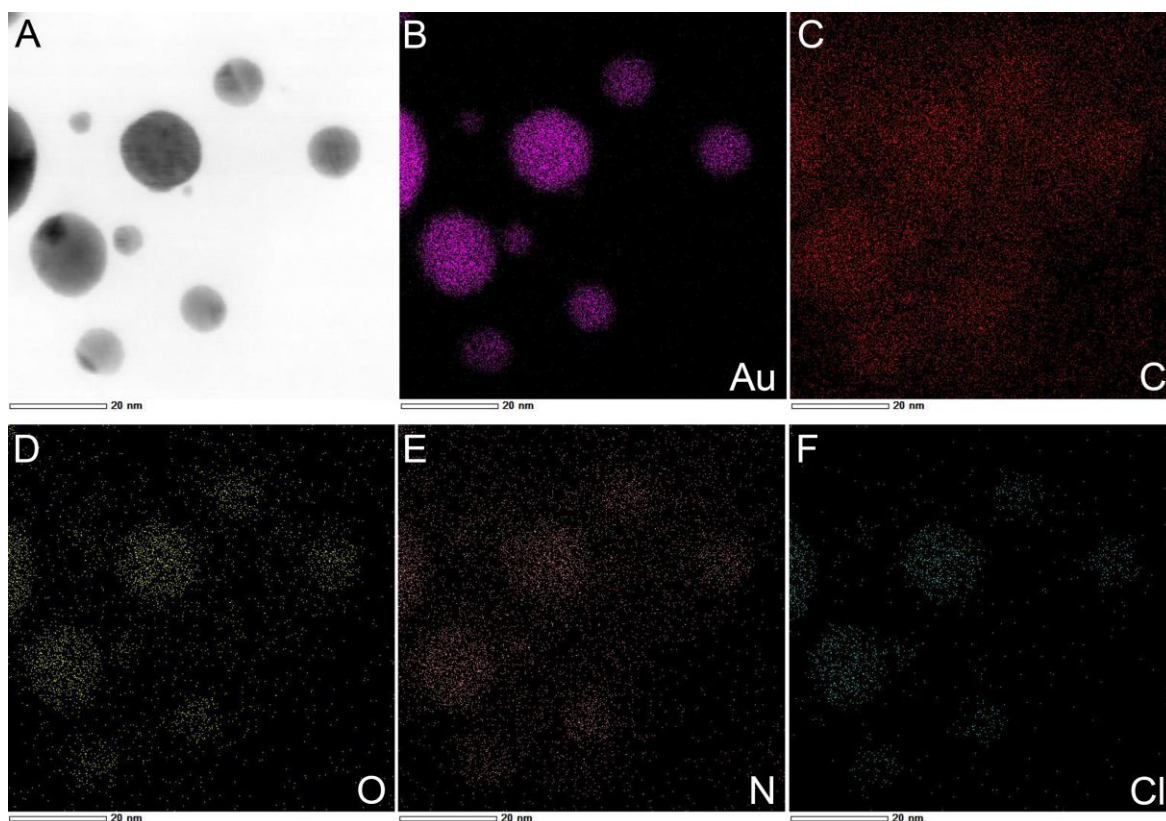

**Figure S2.** (A) TEM image of CD/Au<sup>3+</sup> system. (B-F) TEM-mapping illustrating Au, C, O, N and Cl.

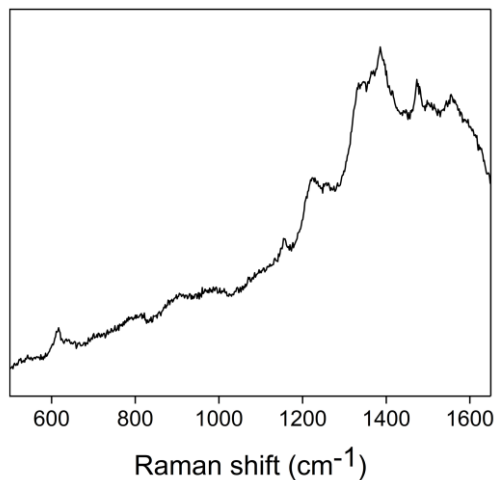

**Figure S3.** Raman spectrum of the prepared CD.

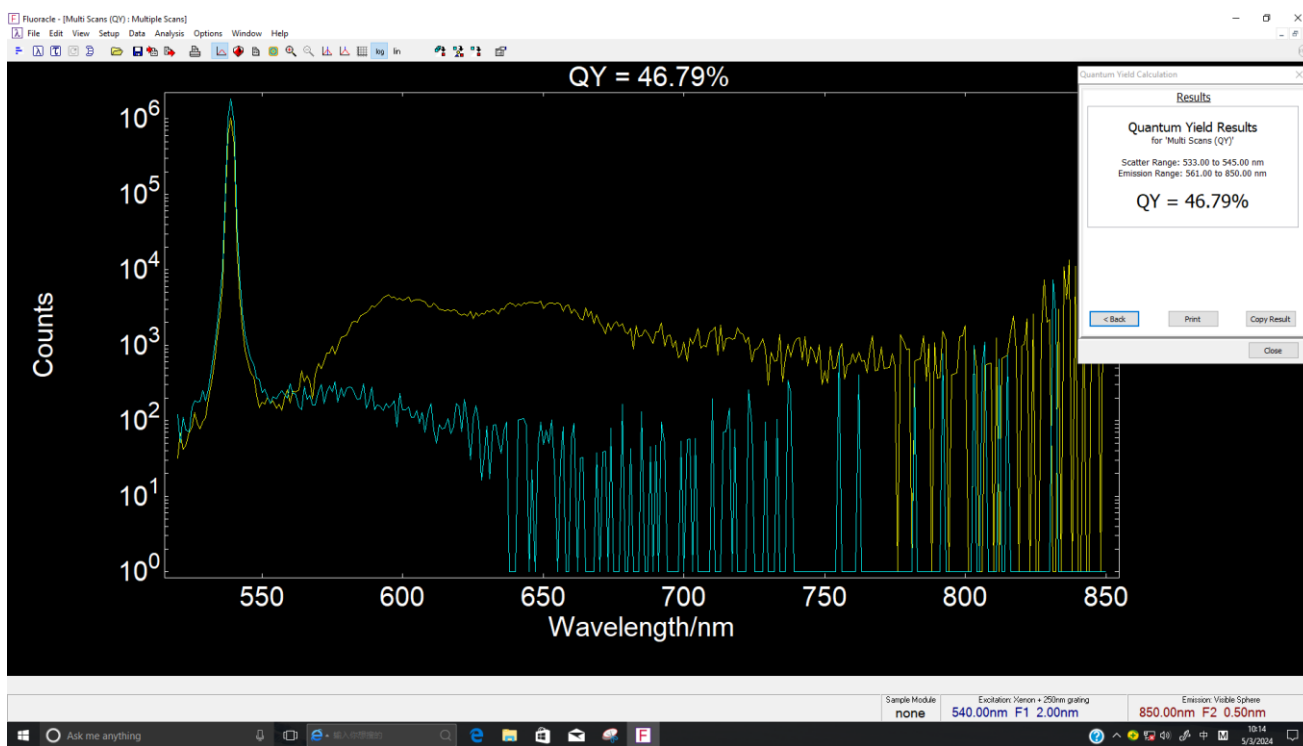

**Figure S4.** Fluorescence emission spectra of CD and reference water with the Y-axis of logarithmic photon counts.

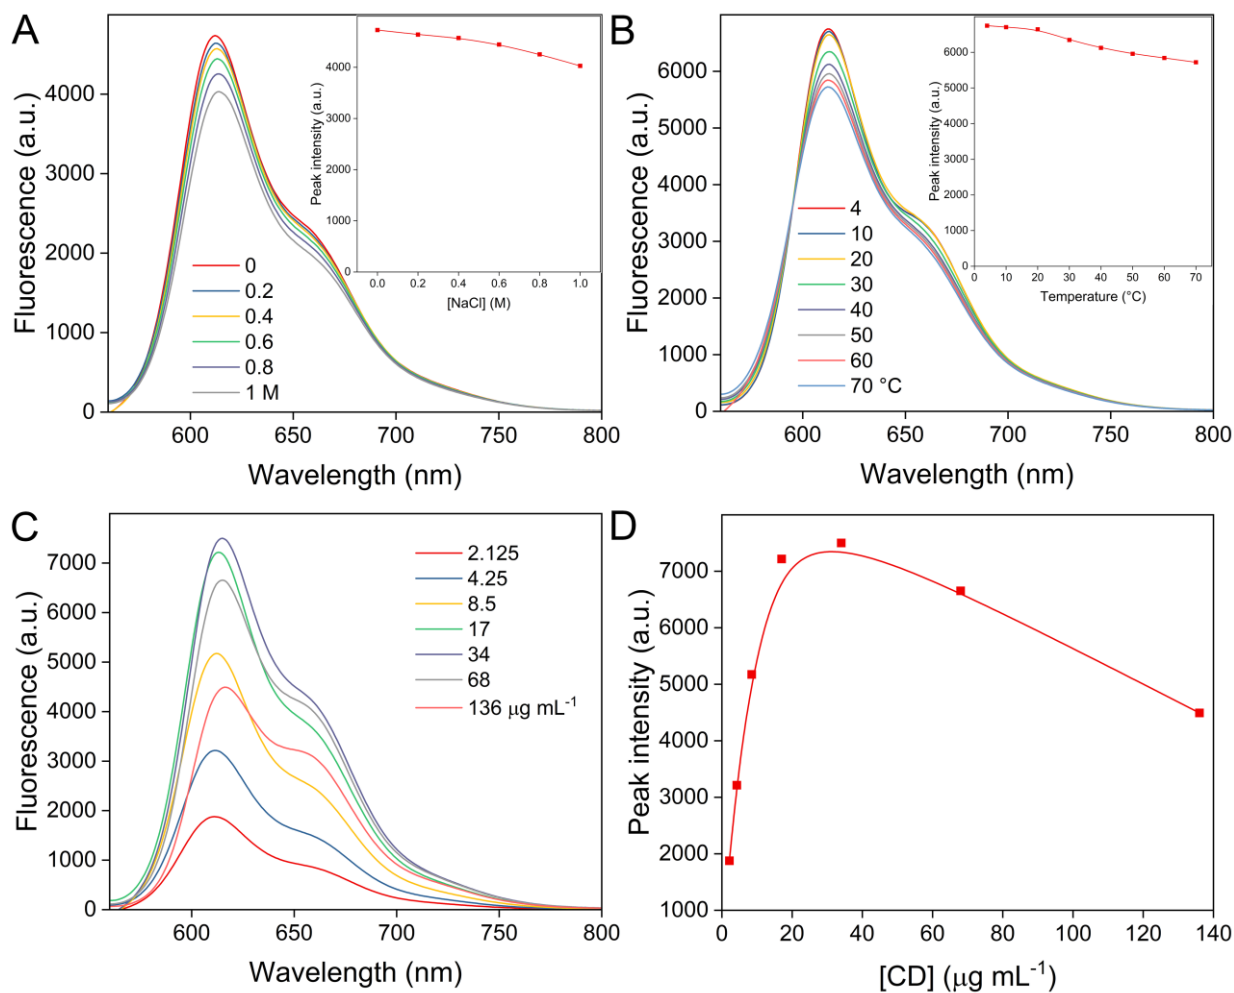

**Figure S5.** (A) Fluorescence emission spectra of CD in the presence of salt with a series of concentrations. Inset shows the relationship between the peak intensity and the concentration. (B) Fluorescence emission spectra of CD incubated at various temperatures. Inset shows the relationship between the peak intensity and the temperature. (C) Fluorescence emission spectra of CD with a series of concentrations. (D) shows the relationship between the peak intensity and the concentration.

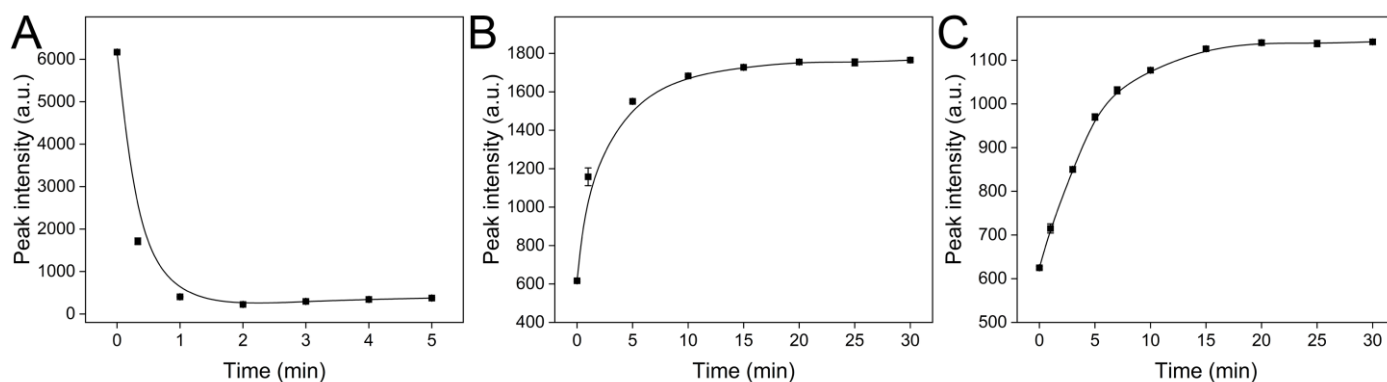

**Figure S6.** Optimizations of (A) the reaction time with  $\text{Au}^{3+}$ , (B) the reaction time with Cys and (C) the reaction time with GSH.

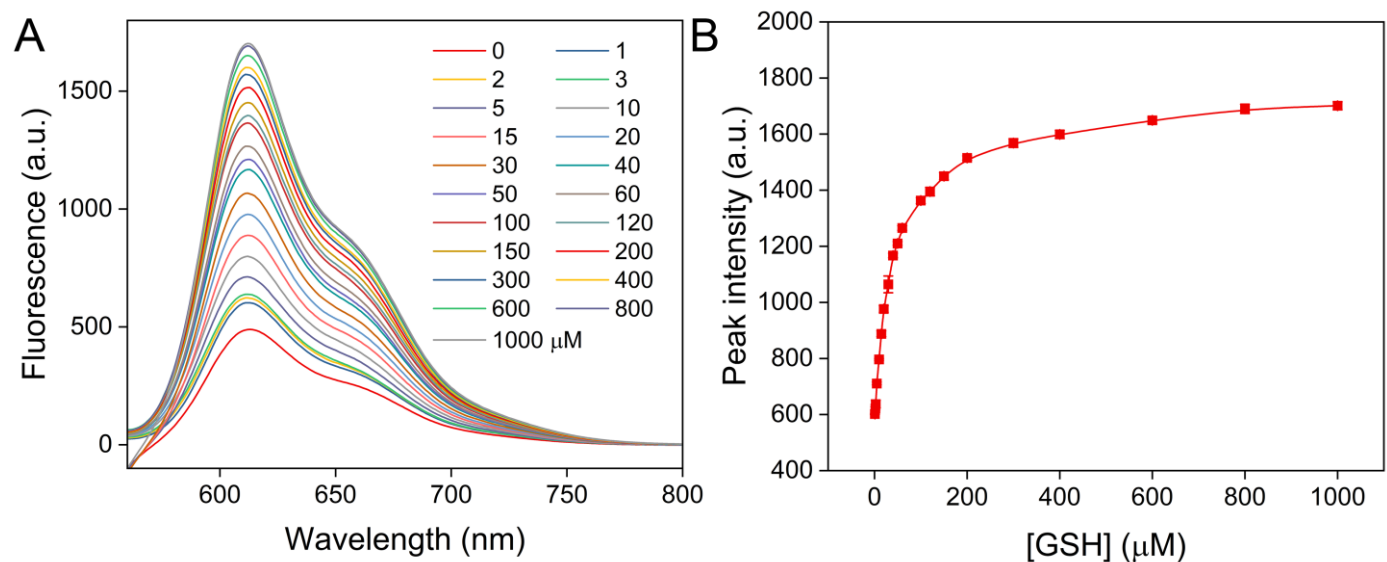

**Figure S7.** (A) Fluorescence emission spectra for the detection of GSH with a series of concentrations. (B) The relationship between the peak intensity and GSH concentration.

**Table S1.** Comparison of the analytical performances of recent Au<sup>3+</sup> assays.

| Technique                    | Strategy                                                       | Detection range<br>(M)                           | LOD (M)                | Ref          |
|------------------------------|----------------------------------------------------------------|--------------------------------------------------|------------------------|--------------|
| fluorescence                 | bis-pyrene-containing fluorescent receptor                     | 0 – 6×10 <sup>-6</sup>                           | 7.5×10 <sup>-7</sup>   | 1            |
| colorimetry                  | plasmonic H <sub>0.3</sub> MoO <sub>3</sub> nanoparticles      | 5×10 <sup>-7</sup> – 7×10 <sup>-5</sup>          | 4.5×10 <sup>-7</sup>   | 2            |
| fluorescence                 | rhodamine based probe                                          | 5×10 <sup>-7</sup> – 3×10 <sup>-6</sup>          | 3.4×10 <sup>-7</sup>   | 3            |
| colorimetry                  | indolino-spiroanthoxazine probe                                | 2.5×10 <sup>-7</sup> – 5×10 <sup>-7</sup>        | 3.35×10 <sup>-7</sup>  | 4            |
| fluorescence/<br>colorimetry | dual-functional probe equipped with smartphone<br>chromaticity | 0 – 3×10 <sup>-7</sup>                           | 6.8×10 <sup>-8</sup>   | 5            |
| fluorescence                 | red fluorescent CD                                             | 10 <sup>-6</sup> – 5×10 <sup>-6</sup>            | 2.9×10 <sup>-8</sup>   | 6            |
| fluorescence                 | functional CD-hydrogel complex                                 | 6.5×10 <sup>-9</sup> –<br>2.193×10 <sup>-5</sup> | 3.98×10 <sup>-9</sup>  | 7            |
| multichannel<br>detection    | AIEE behavior of rhodamine derivative                          | 0 – 4×10 <sup>-8</sup>                           | 2.98×10 <sup>-10</sup> | 8            |
| fluorescence                 | fluorescent CD                                                 | 10 <sup>-7</sup> – 7×10 <sup>-6</sup>            | 10 <sup>-8</sup>       | this<br>work |

AIEE, aggregation-induced emission enhancement.

## References

1. B. Dey, D. Boje, S. Giri and A. K. Atta, Bis-pyrene-containing fluorescent receptor for explosive picric acid and Au(III) via dynamic excimer quenching process in aqueous medium: Practical application. *J. Photochem. Photobiol., A*, 2024, **448**, 115293.
2. W. Huang, L. Wang, D. Y. Long and X. N. Liu, Colorimetric determination and recycling of gold(III) ions using label-free plasmonic H<sub>0.3</sub>MoO<sub>3</sub> nanoparticles. *Microchim. Acta*, 2023, **190**, 245.
3. G. Suna, E. Erdemir, L. Liv, S. Gunduz, T. Ozturk and E. Karakuş, Multi-channel detection of Au(III) ions by a novel rhodamine based probe. *Sens. Actuator B-Chem.*, 2022, **360**, 131658.
4. K. Naksomboon, N. Kaewchangwat, W. Sirisaksoontorn and K. Suttisintong, A novel indolino-spiro-naphthooxazine as the highly sensitive and selective probe for colorimetric detection of Au<sup>3+</sup>. *Dyes Pigm.*, 2023, **214**, 111193.
5. Y. B. Gan, G. X. Yin, Z. M. Xu, H. Y. Zhou, T. Yu, H. T. Li and P. Yin, A dual-functional fluorescent probe for simultaneous visualization and quantification of Au and Pd species in environmental and biological systems. *Chem. Eng. J.*, 2023, **451**, 138437.
6. X. C. Li, Q. Hu, K. Yang, S. J. Zhao, S. H. Zhu, B. H. Wang, Y. Zhang, J. Yi, X. Z. Song and M. H. Lan, Red fluorescent carbon dots for sensitive and selective detection and reduction of Au<sup>3+</sup>. *Sens. Actuator B-Chem.*, 2022, **371**, 132534.
7. D. Zhao, H. Liu, M. Y. Xu, C. X. Yin, X. C. Xiao and K. Dai, Functional carbon dots-hydrogel complex for selective antibacterial and detection applications. *Spectrochim. Acta, Part A*, 2024, **314**, 124195.

8. A. Kapoor, Pratibha, J. K. Rajput and A. Kumar, AIEE active azomethine-based rhodamine derivative for ultrasensitive multichannel detection of Au<sup>3+</sup> through a fluorimetrically, electrochemically, and RGB-based sensing assay. *Anal. Chem.*, 2023, **95**, 5796-5806.
